# Supplementary material
Source: PubMed Central journal article supplement (PMC4128244)
Supplement: NIHMS610345-supplement-supplement_1.pdf [file NIHMS610345-supplement-supplement_1.pdf]

Supplemental Table 1. Baseline Demographic and Clinical Parameters

|                                                         | Flare (n = 28) | NF (n = 28)  |
|---------------------------------------------------------|----------------|--------------|
| Average Age ( $\pm$ SD)                                 | 46.9 (14.0)    | 47.2 (12.3)  |
| Median Age at Diagnosis                                 | 39.5           | 41.0         |
| Average Number of ACR Criteria                          | 5.5            | 5.0          |
| Baseline Average SELENA-SLEDAI ( $\pm$ SD) <sup>a</sup> | 3.8 (3.7)      | 2.6 (3.2)    |
| Baseline Average ESR ( $\pm$ SD) <sup>b</sup>           | 25.5 (21.3)    | 16.8 (9.6)   |
| <b>Medications (Number of SLE patients treated)</b>     |                |              |
| • Prednisone                                            | 11             | 8            |
| • Immunosuppressants <sup>c</sup>                       | 12             | 10           |
| • Anti-malarials <sup>d</sup>                           | 21             | 21           |
| • Biologics <sup>e</sup>                                | 2              | 2            |
|                                                         | Flare (n = 13) | SNF (n = 13) |
| Baseline Average SELENA-SLEDAI ( $\pm$ SD) <sup>a</sup> | 3.0 (4.3)      | 2.9 (2.0)    |
| Baseline Average ESR ( $\pm$ SD) <sup>b</sup>           | 31.3 (23.0)    | 27.0 (21.4)  |
| <b>Medications (Number of SLE patients treated)</b>     |                |              |
| • Prednisone                                            | 5              | 3            |
| • Immunosuppressants <sup>c</sup>                       | 7              | 8            |
| • Anti-malarials <sup>d</sup>                           | 10             | 9            |
| • Biologics <sup>e</sup>                                | 1              | 1            |

<sup>a</sup> Flare vs NF  $p = 0.2451$ ; Flare vs SNF  $p = 0.7065$  by Wilcoxon matched-pairs test

<sup>b</sup> Flare vs NF  $p = 0.0870$ ; Flare vs SNF  $p = 0.5967$  by Wilcoxon matched-pairs test

<sup>c</sup> azathioprine, mycophenolate mofetil, or methotrexate

<sup>d</sup> hydroxychloroquine or quinacrine

<sup>e</sup> infliximab or etanercept

**Supplemental Table 2. Soluble mediators tested in SLE and control plasma**

| <b>Innate</b>      | <b>Th1-like</b>   | <b>NGF/TNFR Superfamily</b>         |
|--------------------|-------------------|-------------------------------------|
| IL-1 $\alpha$      | IL-12 (p70)       | BLyS*                               |
| IL-1 $\beta$       | IFN- $\gamma$     | APRIL*                              |
| IL-1RA             | IL-2              | sCD40L                              |
| IFN- $\alpha$ **   | IL-2RA            | sFas                                |
| IFN- $\beta$ **    |                   | sFasL                               |
| G-CSF**            | <b>Th-17 like</b> | TNF- $\alpha$                       |
|                    | IL-17A            | TNFR1 (p55)                         |
| <b>Homeostasis</b> | IL-21             | TNFR2 (p75)                         |
| IL-7**             | IL-23             | TRAIL**                             |
| IL-15              | IL-6              | NGF $\beta$ **                      |
| <b>Other</b>       | <b>Th2-like</b>   | <b>Chemokine/Adhesion molecules</b> |
| LIF**              | IL-4**            | IL-8/CXCL8                          |
| PAI-1**            | IL-5              | IP-10/CXCL10                        |
| PDGF-BB**          | IL-13             | RANTES/CCL5**                       |
| Resistin**         |                   | MIP-1 $\alpha$ /CCL3                |
| Leptin             | <b>Regulatory</b> | MIP-1 $\beta$ /CCL4                 |
| SCF                | IL-10             | MCP-1/CCL2                          |
|                    | TGF- $\beta$      | MCP-3/CCL7                          |
|                    |                   | GRO $\alpha$ /CXCL1**               |
|                    |                   | SDF-1/CXCL12                        |
|                    |                   | MIG/CXCL9                           |
|                    |                   | Eotaxin/CCL11**                     |
|                    |                   | ICAM-1                              |
|                    |                   | VCAM-1**                            |
|                    |                   | sE-selectin                         |
|                    |                   | VEGF-A**                            |

\*assessed by ELISA

\*\* no statistical difference between SLE patients and healthy controls





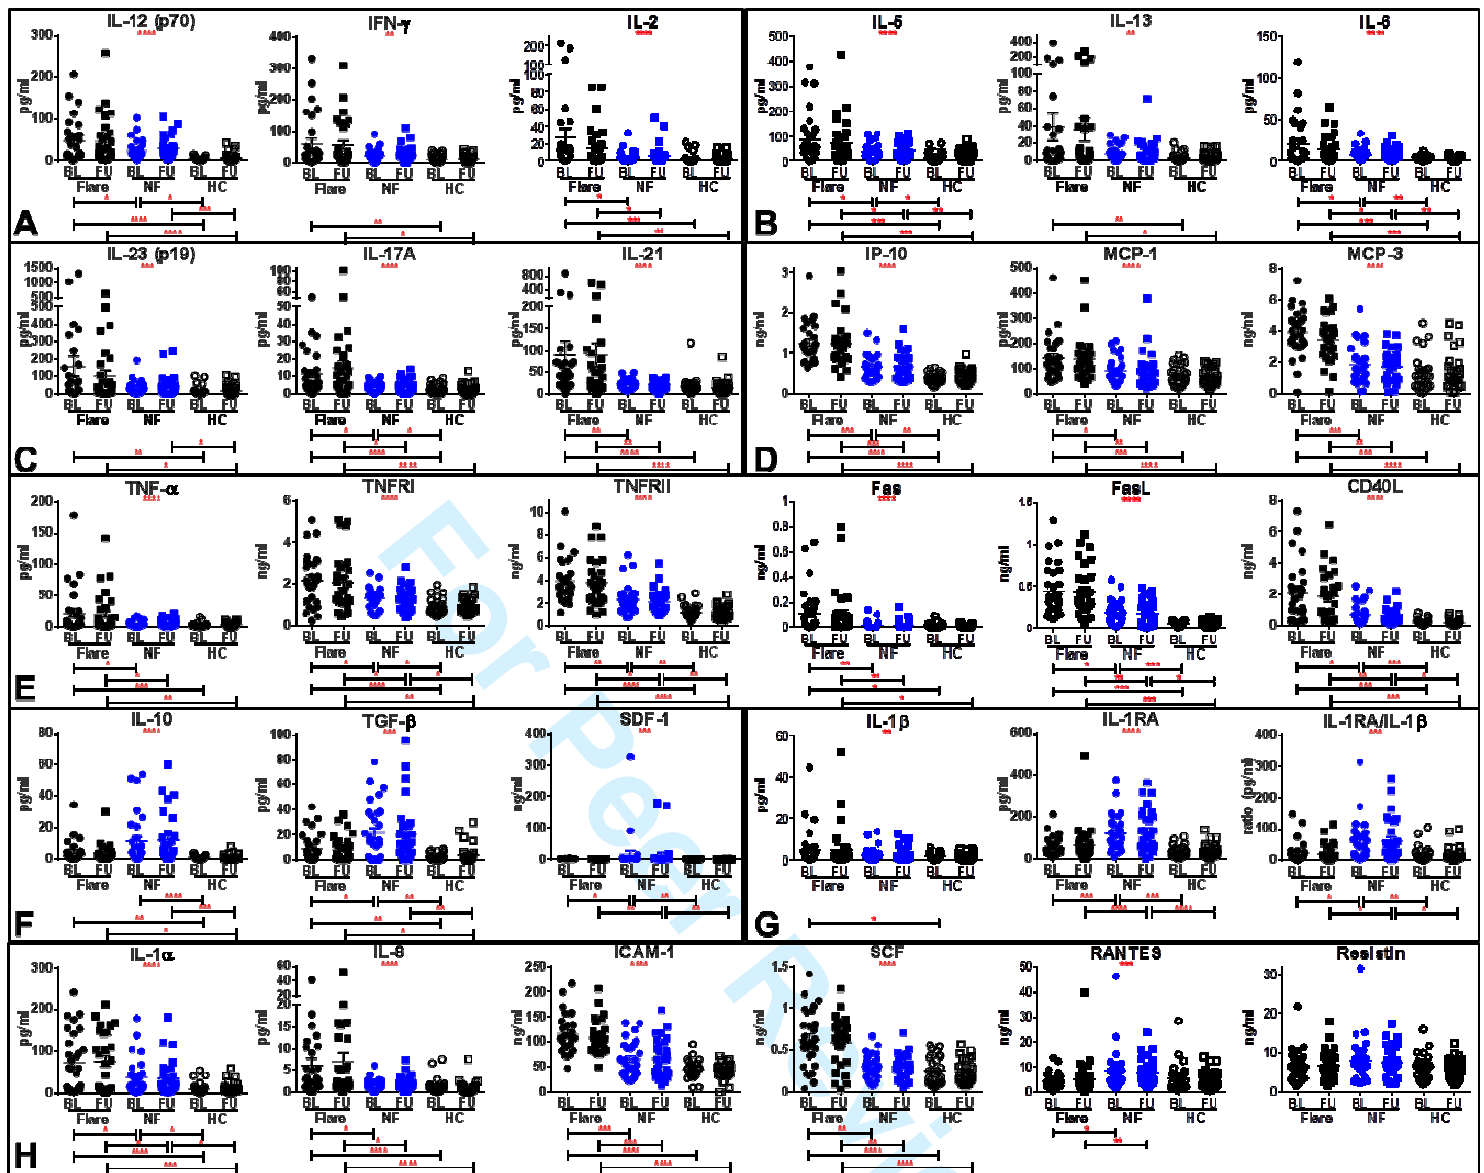

**Supplementary Figure 1.** Altered adaptive immunity and soluble TNF superfamily members in SLE patients with impending and concurrent disease flare. Plasma Th1 (A, IL-12p70, IFN-g, and IL-2), Th2 (B, IL-5, IL-13, and IL-6), and Th17 (C, IL-23p19, IL-17A, and IL-21) type cytokines, as well as chemokines (D, IP-10, MCP-1, and MCP-3), soluble TNF superfamily members (E, TNF- $\alpha$ , TNFR1, TNFR2, Fas, FasL, and CD40L), regulatory mediators (F, IL-10, TGF- $\beta$ , SDF-1), IL-RA/IL-1 $\beta$  balance (G, IL-1 $\beta$ , IL-1RA, and ratio of IL-1RA:IL-1 $\beta$ ), and other inflammatory mediators (H, IL-1 $\alpha$ , IL-8, ICAM-1, SCF, RANTES, and Resistin) (mean  $\pm$  SEM) were measured (mean  $\pm$  SEM) by xMAP multiplex assay according to manufacturer protocol (Affymetrix, Santa Clara, CA) and read on a Bio-plex 200 reader (Bio-Rad, Hercules, CA). Samples were procured at baseline (BL)/pre-vaccination (circle) from 28 EA SLE patients who exhibited disease flare (black symbol) 6 to 12 weeks later (follow-up [FU], square) vs. age ( $\pm$  5 years)/race/gender/time of sample procurement matched SLE patients who did not flare (NF, blue symbol) vs. age ( $\pm$  5 years)/race/gender/time of sample procurement matched unrelated/unaffected healthy controls (HC, open symbol). Significance determined by Friedman test with Dunn's multiple comparison (Friedman test significance listed under each title). \*  $p < 0.05$ , \*\*  $p < 0.01$ , \*\*\*  $p < 0.001$ , \*\*\*\*  $p < 0.0001$

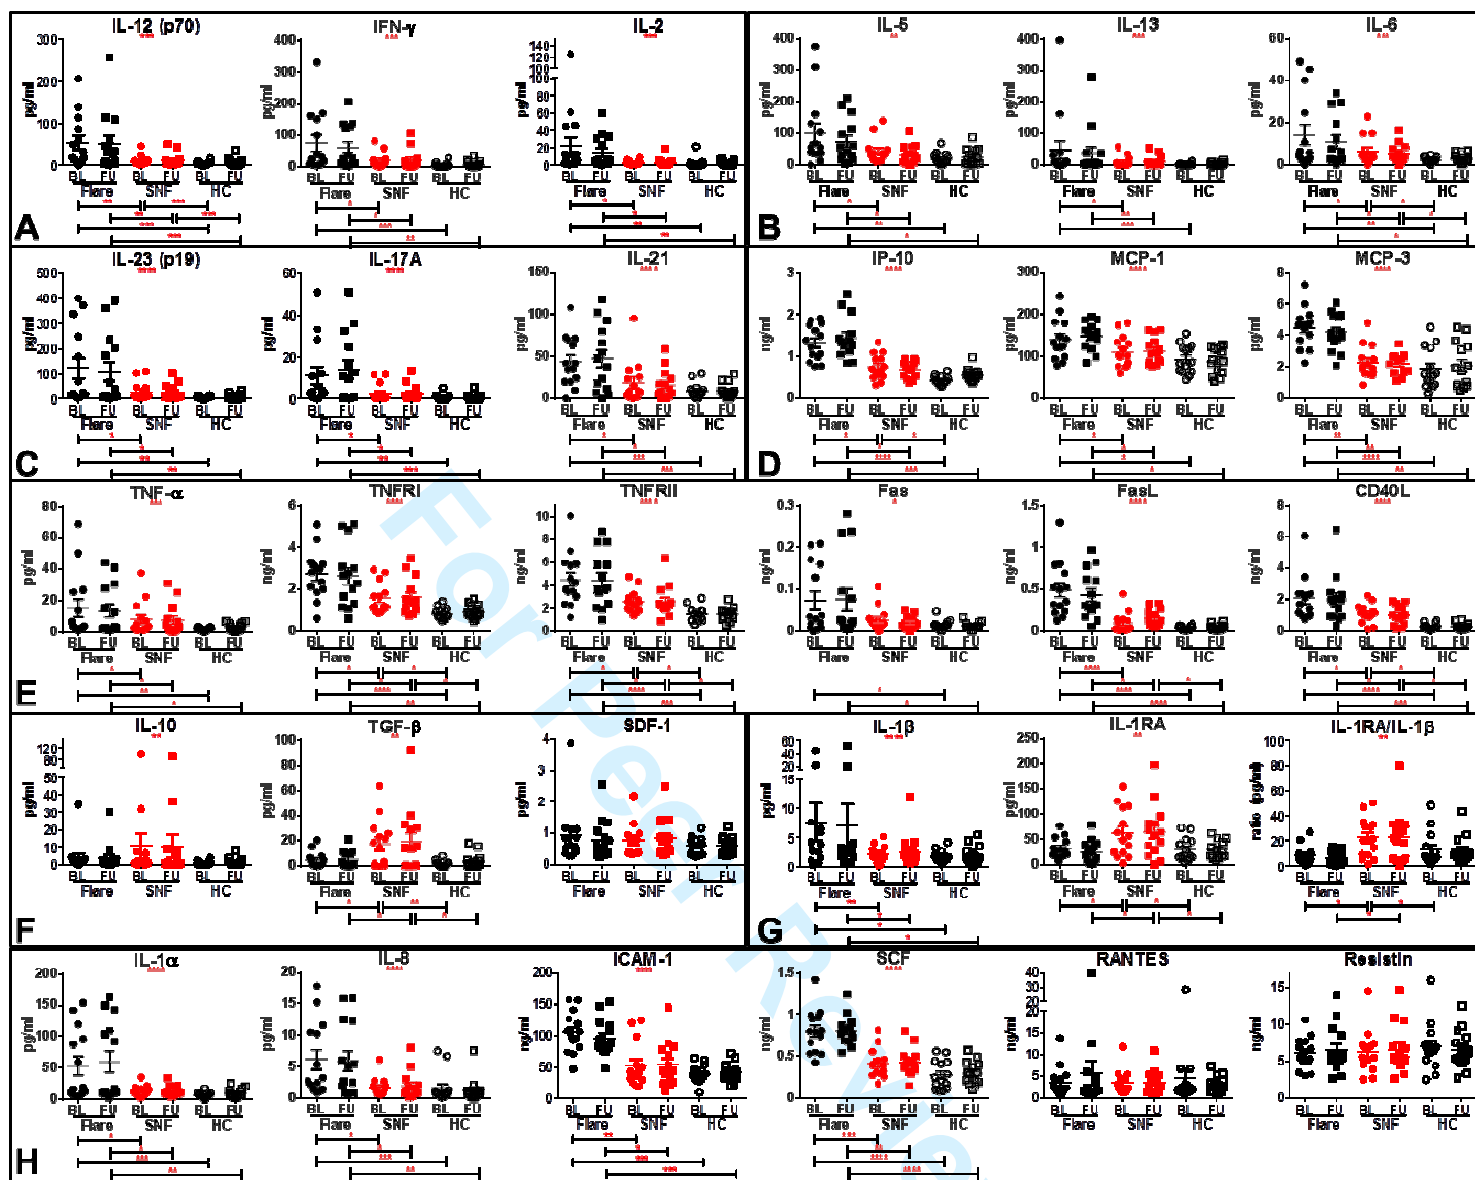

**Supplementary Figure 2.** SLE patients with impending and concurrent disease flare have altered adaptive immunity and soluble TNF superfamily members compared to corresponding period of non-flare. Plasma Th1 (A, IL-12p70, IFN $\gamma$ , and IL-2), Th2 (B, IL-5, IL-13, and IL-6), and Th17 (C, IL-23p19, IL-17A, and IL-21) type cytokines, as well as chemokines (D, IP-10, MCP-1, and MCP-3), soluble TNF superfamily members (E, TNF- $\alpha$ , TNFR1, TNFR2, Fas, FasL, and CD40L), regulatory mediators (F, IL-10, TGF- $\beta$ , SDF-1), IL-RA/IL-1b balance (G, IL-1b, IL-1RA, and ratio of IL-1RA:IL-1b), and other inflammatory mediators (H, IL-1a, IL-8, ICAM-1, SCF, RANTES, and Resistin) (mean  $\pm$  SEM) were measured (mean  $\pm$  SEM) by xMAP multiplex assay according to manufacturer protocol (Affymetrix, Santa Clara, CA) and read on a Bio-plex 200 Luminex-type reader (Bio-Rad, Hercules, CA). Samples were procured at baseline (BL)/pre-vaccination (circle) from 13 EA SLE patients who exhibited disease flare (black symbol) 6-12 weeks later (follow-up [FU], square) vs. the *same* SLE patients in a separate influenza season when they did not exhibit disease flare post-vaccination (SNF, red symbol) vs. age ( $\pm$  5 years)/race/gender/time of sample procurement matched unrelated/unaffected healthy controls (HC, open symbol). Significance determined by Friedman test with Dunn's multiple comparison (Friedman test significance listed under each title). \*  $p < 0.05$ , \*\*  $p < 0.01$ , \*\*\*  $p < 0.001$ , \*\*\*\*  $p < 0.0001$
